# Supplementary material for: Anti-Fatigue Effects of the Unique Polysaccharide Marker of Dendrobium officinale on BALB/c Mice
Source: PubMed Central journal article supplement (PMC6155575; doi:10.3390/molecules22010155), 2017-01-18
Supplement: molecules-22-00155-s001.pdf [file molecules-22-00155-s001.pdf]

# Supplementary Materials: Anti-Fatigue Effects of the Unique Polysaccharide Marker of *Dendrobium Officinale* on BALB/c Mice

Wei Wei, Zhi-Peng Li, Tong Zhu, Hau-Yee Fung, Tin-Long Wong, Xin Wen, Dik-Lung Ma, Chung-Hang Leung and Quan-Bin Han

**Table S1.** Effects of DOP and *Rhodiola* extract on body weight (g) of BALB/c mice.

|               | Day 1        | Day 7        | Day 14       | Day 21       | Day 28       |
|---------------|--------------|--------------|--------------|--------------|--------------|
| Normal group  | 21.54 ± 0.52 | 22.18 ± 0.52 | 22.74 ± 0.72 | 23.28 ± 1.05 | 24.08 ± 0.77 |
| Control group | 22.53 ± 0.43 | 22.54 ± 0.63 | 22.70 ± 0.98 | 23.68 ± 0.77 | 23.96 ± 0.91 |
| DOP group     | 22.42 ± 1.02 | 22.84 ± 0.93 | 23.16 ± 1.29 | 24.10 ± 1.43 | 24.59 ± 1.54 |
| PC group      | 23.38 ± 0.33 | 23.21 ± 0.72 | 23.61 ± 0.87 | 24.44 ± 1.17 | 24.76 ± 0.38 |

The data were presented as the mean ± SD ( $n = 8$ ). Normal group means mice were unexposed to weight-loaded swimming endurance test. Control group means mice were exposed to weight-loaded swimming endurance test and treated with distilled water. PC group means positive group, *Rhodiola* extract group.

**Table S2.** Effects of DOP and *Rhodiola* extract on food intake (g) of BALB/c mice.

|               | First Week | Second Week | Third Week | Fourth Week |
|---------------|------------|-------------|------------|-------------|
| Normal group  | 186.3      | 182.1       | 185.4      | 188.1       |
| Control group | 194.8      | 185.4       | 194.0      | 197.5       |
| DOP group     | 203.3      | 214.8       | 221.2      | 222.7       |
| PC group      | 202.6      | 197.5       | 200.3      | 206.7       |

Normal group means mice were unexposed to weight-loaded swimming endurance test. Control group means mice were exposed to weight-loaded swimming endurance test and treated with distilled water. PC group means positive group, *Rhodiola* extract group.

**Table S3.** Effects of DOP and *Rhodiola* extract on organ index of BALB/c mice.

|               | Liver        | Heart       | Kidney       | Spleen      |
|---------------|--------------|-------------|--------------|-------------|
| Normal group  | 53.70 ± 1.90 | 6.43 ± 0.85 | 15.84 ± 0.73 | 4.37 ± 0.32 |
| Control group | 52.73 ± 1.30 | 6.36 ± 0.73 | 15.75 ± 0.43 | 4.17 ± 0.47 |
| DOP group     | 54.25 ± 2.52 | 6.86 ± 0.27 | 16.60 ± 1.18 | 4.86 ± 0.49 |
| PC group      | 53.44 ± 2.62 | 6.44 ± 0.70 | 15.60 ± 1.17 | 5.34 ± 0.68 |

The data were presented as means ± S.D. ( $n = 8$ ). Organ index = weight of organ (mg)/body weight (g). PC group means positive group, *Rhodiola* extract group.
